RESEARCH ARTICLE

# Predicting Length of Stay among Patients Discharged from the Emergency Department—Using an Accelerated Failure Time Model

Chung-Hsien Chaou<sup>1,2</sup>, Hsiu-Hsi Chen<sup>2</sup>, Shu-Hui Chang<sup>2</sup>, Petrus Tang<sup>3</sup>, Shin-Liang Pan<sup>4</sup>, Amy Ming-Fang Yen<sup>5</sup>, Te-Fa Chiu<sup>1\*</sup>

**1** Department of Emergency Medicine, Chang Gung Memorial Hospital, Linkou and Chang Gung University College of Medicine, Taoyuan, Taiwan, **2** Institute of Epidemiology and Preventive Medicine, College of Public Health, National Taiwan University, Taipei, Taiwan, **3** Graduate Institute of Biomedical Sciences, College of Medicine, Chang Gung University, Taoyuan, Taiwan, **4** Department of Physical Medicine and Rehabilitation, National Taiwan University Hospital and National Taiwan University College of Medicine, Taipei, Taiwan, **5** School of Oral Hygiene, College of Oral Medicine, Taipei Medical University, Taipei, Taiwan

\* [tefachiu@gmail.com](mailto:tefachiu@gmail.com)

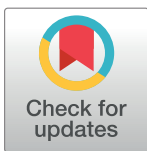

## Abstract

### Background

Emergency department (ED) crowding continues to be an important health care issue in modern countries. Among the many crucial quality indicators for monitoring the throughput process, a patient's length of stay (LOS) is considered the most important one since it is both the cause and the result of ED crowding. The aim of this study is to identify and quantify the influence of different patient-related or diagnostic activities-related factors on the ED LOS of discharged patients.

### Methods

This is a retrospective electronic data analysis. All patients who were discharged from the ED of a tertiary teaching hospital in 2013 were included. A multivariate accelerated failure time model was used to analyze the influence of the collected covariates on patient LOS.

### Results

A total of 106,206 patients were included for analysis with an overall medium ED LOS of 1.46 (interquartile range = 2.03) hours. Among them, 96% were discharged by a physician, 3.5% discharged against medical advice, 0.5% left without notice, and only 0.02% left without being seen by a physician. In the multivariate analysis, increased age (>80 vs <20, time ratio (TR) = 1.408,  $p < 0.0001$ ), higher acuity level (triage level I vs. level V, TR = 1.343,  $p < 0.0001$ ), transferred patients (TR = 1.350,  $p < 0.0001$ ), X-rays obtained (TR = 1.181,  $p < 0.0001$ ), CT scans obtained (TR = 1.515,  $p < 0.0001$ ), laboratory tests (TR = 2.654,  $p < 0.0001$ ), consultation provided (TR = 1.631,  $p < 0.0001$ ), observation provided (TR = 8.435,  $p < 0.0001$ ), critical condition declared (TR = 1.205,  $p < 0.0001$ ), day-shift arrival (TR = 1.223,  $p < 0.0001$ ), and an increased ED daily census (TR = 1.057,  $p < 0.0001$ ) lengthened the ED LOS with various effect sizes. On the other hand, male sex (TR = 0.982,  $p = 0.002$ ),

## OPEN ACCESS

**Citation:** Chaou C-H, Chen H-H, Chang S-H, Tang P, Pan S-L, Yen AM-F, et al. (2017) Predicting Length of Stay among Patients Discharged from the Emergency Department—Using an Accelerated Failure Time Model. *PLoS ONE* 12(1): e0165756. doi:10.1371/journal.pone.0165756

**Editor:** Delmiro Fernandez-Reyes, University College London, UNITED KINGDOM

**Received:** July 14, 2016

**Accepted:** October 17, 2016

**Published:** January 20, 2017

**Copyright:** © 2017 Chaou et al. This is an open access article distributed under the terms of the [Creative Commons Attribution License](https://creativecommons.org/licenses/by/4.0/), which permits unrestricted use, distribution, and reproduction in any medium, provided the original author and source are credited.

**Data Availability Statement:** Data are available from Figshare (DOI: [10.6084/m9.figshare.4509032](https://doi.org/10.6084/m9.figshare.4509032)).

**Funding:** The authors received no specific funding for this work.

**Competing Interests:** The authors have declared that no competing interests exist.

**Abbreviations:** ED, emergency department; IQR, interquartile range; LOS, length of stay; LCGMH,

Linkou Chang-Gung Memorial Hospital; SD, standard deviation.

weekend arrival (TR = 0.928,  $p < 0.0001$ ), and adult non-trauma patients (compared with pediatric non-trauma, TR = 0.687,  $p < 0.0001$ ) were associated with shortened ED LOS. A prediction diagram was made accordingly and compared with the actual LOS.

## Conclusions

The influential factors on the ED LOS in discharged patients were identified and quantified in the current study. The model's predicted ED LOS may provide useful information for physicians or patients to better anticipate an individual's LOS and to help the administrative level plan its staffing policy.

## Introduction

Emergency department (ED) crowding is a worldwide issue in all health care systems and is associated with the increased incidence of several adverse outcomes [1–3]. Although the etiology of ED crowding is complicated, it can be divided into three aspects: the input, throughput, and output of ED patients [4, 5].

The input of patients (ED visits) has increased significantly over the past two decades [6, 7], and because modern EDs can diagnose and treat a much wider range of patients compared to 20 years ago, it is unlikely that the trend in patient visits will decline in the near future. The destination of patient output (disposition) is mostly either home or stay at hospital. The process of ED admission is often difficult and patients need to wait and receive treatment in the ED observation room. According to a recent study, the ED now accounts for more than one-half of hospital admissions [8]. However, the output blockage is not an issue that can easily be tackled by the ED alone. In order to balance admissions and discharges, a larger scale of planning and coordination may be needed. For instance, it may be necessary for hospital-level administration to distribute available beds according to patient flows, different specialties, staffing changes, and seasonal fluctuations [9–11].

Because patient input and output processes are often related to broader health care issues, the throughput process is therefore left to be the main focus for researchers of ED crowding [4]. An important indicator of the patient management process is the ED length of stay (LOS). ED LOS has been identified as a cause as well as a result of ED crowding [12, 13]. Analyzing the ED LOS of discharged patients is especially important, because in most hospitals, these patients make up more than half of all ED visits and do not have the output blockage problem which often occurred for admitted patients [6, 13]. A recent research found that LOS of non-admitted patients negatively correlated with ED quality and performance indicator [5]. Previous studies also reported some of the factors contributing to prolonged ED LOS [14, 15]; however, the effect of individual or environmental factors on ED LOS has not been quantified and compared. The aim of this study was to identify and quantify the influence of different patient-related or diagnostic activities-related factors on the ED LOS of discharged patients.

## Methods

### Study design

This was a retrospective analysis of the administrative database from Linkou Chang-Gung Memorial Hospital (LCGMH). The study protocol, variables analyzed, and statistical methods were determined before the study was conducted. The study was approved by the Chang Gung

Memorial Hospital institutional review board (1045309B) and was exempt from the requirement of obtaining informed consent.

## Study setting and population

The study was conducted in the ED of LCGMH, a tertiary medical center and teaching hospital with a 3,600-bed capacity and an annual ED visit of approximately 150,000 patients. LCGMH is also a level I trauma center with all surgical subspecialties available 24 hours a day. The LCGMH ED contains one computer tomography (CT) examination room and two X-ray rooms within the ED area. Patients originate from the area of northern Taiwan and come in with general emergency complaints. The inclusion criterion was all patients who visited the ED of LCGMH and had been discharged from the ED from January 2013 to December 2013. These patients included those who left before being approached by an ED physician (left without being seen), those who were discharged by the ED physician after management completed, those who insisted to leave despite doctors suggested otherwise (left against medical advice), and those who left without notice. Patients with missing registration times or leaving times were excluded from the analysis.

The LCGMH ED contains a fast-track system for non-urgent medical patients. These generally include all adult non-trauma patients who were ambulatory (or at least could wait in a wheelchair) and were triaged as levels III to V. The fast-track system opens at eight in the morning and closes an hour after midnight. During these open hours, several urgent clinics will be in operation, each containing an emergency physician, an ED nurse, an examination bed, and urgent diagnostic tools, such as electrocardiograms (ECG) and bedside sonography machines. The number of urgent clinics ranges from one to three depending on average daily patient flow.

## Data collection

All data were drawn from the hospital's administrative database. The time variables included triage time recorded by the triage nurse, physician time recorded by the computer when the first primary ED physician approached the patient, and time leaving the hospital recorded by the registration counter. A patient's ED LOS was defined by the time from registration to leaving. The triage level was assigned by a specialized triage nurse using the five-level Taiwan Triage Acuity System (TTAS). Patients were divided into three general categories by the triage nurse: adult non-trauma, pediatric non-trauma, and trauma patients. The demographic variables collected included patient age and gender. The disease- and acuity-associated variables included patient category, triage level, whether the patient was transferred from another hospital, whether an admission or observation order was prescribed, and whether a critical status was announced. The decision of admission or observation was decided by the primary ED physician after discussed with patients and their family members. We also documented whether X-rays, CT exams, laboratory exams, consultations, and/or electrocardiograms were provided. The environmental variables included whether the patient came in during the weekend, the shift during which the patient arrived, and the total ED daily census in the same day. The ED daily census was incorporated as a binary variable with a cutoff point of 558 patients; this is the 95<sup>th</sup> percentile of the study ED's daily census.

## Statistical analysis

The primary outcome was the ED LOS of patients who were discharged from the ED. In descriptive analysis, a normality test was performed for continuous variables. The median and interquartile ranges (IQR) were used to describe the central tendency and the spread of data

obviously deviating from the normal distribution. For event time analysis, the Kaplan–Meier method was used to construct an overall survival plot and plotted between strata. The log-rank test was used to compare the difference in survival curves between strata.

For the multivariate analysis of the influence of the collected variables, an accelerated failure time (AFT) model was used. The AFT model is a type of survival analysis that directly models the length of stay as a function of a constellation of factors [16]. The effect size of each factor on LOS is evaluated by regression coefficient ( $b$ ). Taking the exponential of regression coefficient ( $b$ ),  $\exp[b_i]$  are referred to as time ratios (TRs). A TR less than 1 indicates that the LOS is shortened, and a TR greater than 1 implies that the LOS is lengthened [17]. The model was further used to predict individual LOS based on personal influential factors. The predicted LOS was compared with the observed LOS by life-table method. Goodness of fit was also assessed using log-rank test. All analyses were performed using SAS statistical software version 9.3 (SAS Institute Inc., Cary, NC) [18]. A  $p$  value of less than 0.05 was considered statistically significant.

## Results

### Demographic results of included patients

In total, 106,206 patients and their data were included in the study. The mean age of the study population was 35.9 (standard deviation [SD] = 25.7) years, and 52.9% were male. The proportions of patients in different categories were 55.7%, 24.9%, and 19.4% for adult non-trauma, pediatric non-trauma, and trauma patients, respectively. Among five acuity levels, triage level III (63.7%) patients comprised the largest proportion, followed by triage level IV (22.1%), triage level II (8.4%), triage level I (3.5%), and triage level V (2.2%). The median daily ED census was 438 patients (IQR = 71, maximum = 756, minimum = 323). Approximately 3% of the patients were transferred from another hospital. Among the discharged patients, 96% were discharged by a physician, 3.5% discharged against medical advice, 0.5% left without notice, and only 0.02% left without being seen by a physician. Detailed demographic characteristics are shown in [Table 1](#).

### Survival curves for LOS of discharged patients

The median LOS for all discharged patients was 1.46 hours (IQR = 2.07 hours), and the median times of triage to physician and physician to discharge were 0.16 hours (IQR = 0.16 hours) and 1.20 hours (IQR = 2.03 hours), respectively. The Kaplan–Meier curve of the overall survival rate is plotted in [Fig 1](#). The probability of being still in the ED after 1 hour, 3 hours, 6 hours, and 12 hours were 66.7%, 23.7%, 14.1%, and 8.2%, respectively. More than 90% of the included patients were discharged within 10 hours of arriving at the ED. Six additional curves stratified by patient category, triage level, age group, transferal, laboratory test, and consultation are plotted in [Fig 2](#). All six plots showed a significant difference between strata, with  $p$  values  $<0.0001$  using the log-rank test.

### Multivariate AFT analysis for factor influences and LOS prediction

In the multivariate AFT model, a Weibull distribution of the survival time was determined after comparing goodness of fit using the likelihood–ratio statistic between models. The results showed that increased age ( $>80$  vs  $<20$ , TR = 1.408;  $60$ – $80$  vs  $<20$ , TR = 1.432, both  $p < 0.0001$ ), higher acuity level (triage level I vs. level V, TR = 1.343; level II vs. level V, TR = 1.474; both  $p < 0.0001$ ), transferred patients (TR = 1.350,  $p < 0.0001$ ), obtained X-rays (TR = 1.181,  $p < 0.0001$ ), the patients obtaining CTs (TR = 1.515,  $p < 0.0001$ ) or laboratory tests

**Table 1. Patient characteristics (n = 106,206).**

| Variables                    | Descriptive |        | Variables                         | Descriptive |        |
|------------------------------|-------------|--------|-----------------------------------|-------------|--------|
| Total Length of stay (hr)*   | 1.46        | (2.07) | Patient Disposition               |             |        |
| Triage to physician (hr)*    | 0.16        | (0.16) | Discharged by physician           | 101972      | (96.0) |
| physician to discharge (hr)* | 1.20        | (2.03) | Left without noticed              | 509         | (0.48) |
| Age                          | 35.89       | (25.7) | Discharged against medical advice | 3702        | (3.49) |
| Agegroup                     |             |        | Left without being seen           | 23          | (0.02) |
| <20                          | 34385       | (32.4) | Tests required                    |             |        |
| 20–40                        | 26614       | (25.1) | EKG obtained                      | 11429       | (10.8) |
| 40–60                        | 23886       | (22.5) | Blood test obtained               | 41816       | (39.4) |
| 60–80                        | 16369       | (15.4) | X-ray obtained                    | 47490       | (44.7) |
| >80                          | 4952        | (4.66) | CT obtained                       | 6868        | (6.47) |
| Male Sex                     | 56150       | (52.9) | Consultation provided             | 20972       | (19.8) |
| On critical status           | 392         | (0.37) | Arrival time                      |             |        |
| Transferred patients         | 3151        | (2.97) | Day shift (08–16)                 | 39265       | (37.0) |
| Patient entity               |             |        | Middle shift (16–24)              | 43460       | (40.9) |
| Adult non-trauma             | 59171       | (55.7) | Night shift (24–08)               | 23481       | (22.1) |
| Trauma                       | 20584       | (19.4) | Weekday                           |             |        |
| Pediatric non-trauma         | 26451       | (24.9) | Monday                            | 15241       | (14.4) |
| Triage level                 |             |        | Tuesday                           | 14604       | (13.8) |
| level 1                      | 3764        | (3.54) | Wednesday                         | 13664       | (12.9) |
| Level 2                      | 8919        | (8.40) | Thursday                          | 13805       | (13.0) |
| Level 3                      | 67676       | (63.7) | Friday                            | 13951       | (13.1) |
| Level 4                      | 23506       | (22.1) | Saturday                          | 15267       | (14.4) |
| Level 5                      | 2341        | (2.20) | Sunday                            | 19674       | (18.5) |
| Daily ED census *            | 438         | (72.0) |                                   |             |        |

\* Presented as median (IQR)

doi:10.1371/journal.pone.0165756.t001

(TR = 2.654,  $p < 0.0001$ ), a consultation provided (TR = 1.631,  $p < 0.0001$ ), an observation provided (TR = 8.435,  $p < 0.0001$ ), critical condition declared (TR = 1.205,  $p < 0.0001$ ), and day-shift arrival (TR = 1.223,  $p < 0.0001$ ) were associated with prolonged ED LOS. On the other hand, male sex (TR = 0.982,  $p = 0.002$ ), weekend arrival (TR = 0.928,  $p < 0.0001$ ), whether the patient obtained an EKG (TR = 0.850,  $p < 0.0001$ ), and adult non-trauma patients (compared with pediatric non-trauma, TR = 0.687,  $p < 0.0001$ ) were associated with shortened ED LOS. An increased ED daily census resulted in a slight but significant increase in ED LOS (TR = 1.057,  $p < 0.0001$ ). Detailed results of the multivariate analyses are shown in [Table 2](#). Using these results, individual LOS was calculated based on personal influential factors. In [Fig 3](#) the survival curve of predicted LOS was plotted against that of observed LOS. A goodness of fit test between two curves showed lack of statistical significance ( $p = 0.649$ ), which suggests a good predictive validity of this AFT model in the study ED.

## Discussion

In this study, we identified and quantified several influential demographic factors for the ED LOS of discharged patients, including age, patient category, triage acuity level, gender, arrival time, and transfer status. Prediction model was also made according to the analytic results, which showed a good consistency with the original observed data. In managing non-critical or non-emergency cases in the ED, most of the factors incorporated in this study—such as triage

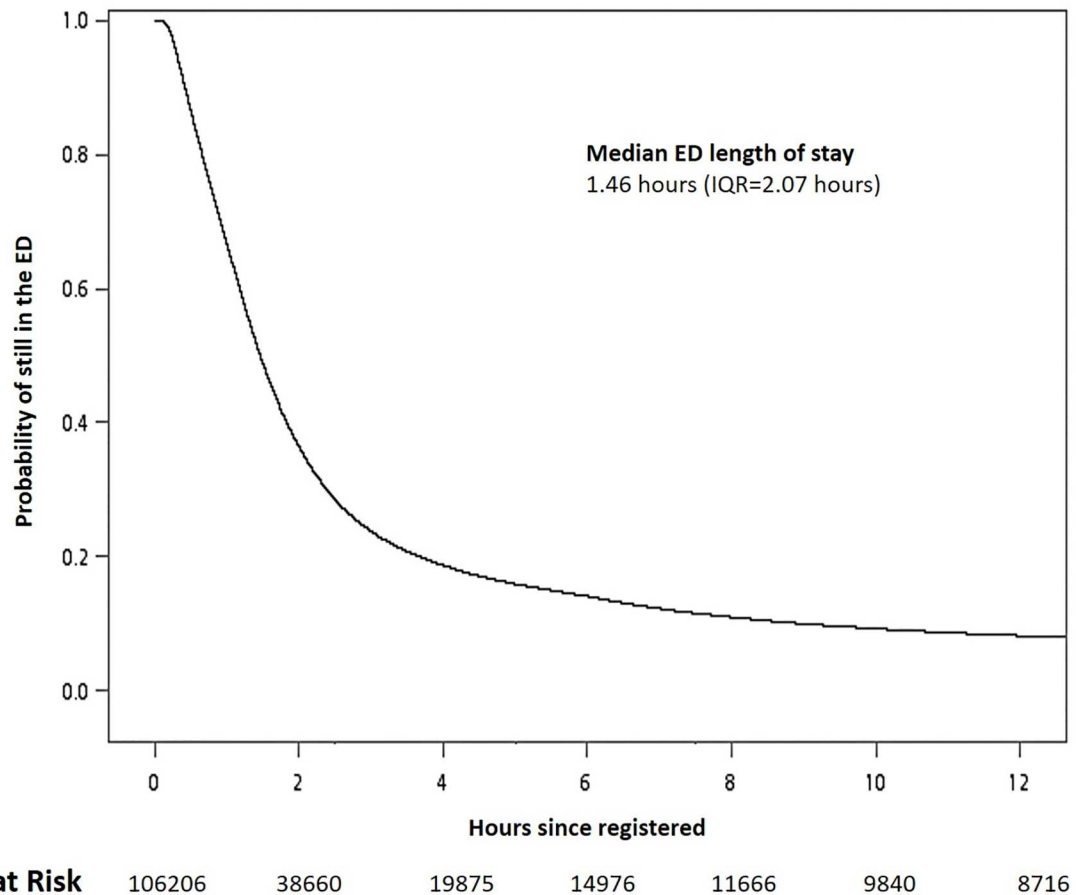

**Fig 1. Kaplan-Meier plot for ED length of stay in discharged patients.**

doi:10.1371/journal.pone.0165756.g001

level, age, arrival time, or whether tests or consultations are provided—can be accurately obtained or anticipated to a certain extent by an experienced ED physician after the first evaluation. Although the TRs may be hospital-dependent according to the local patient population or staffing policies, the model can be used to generate information for an individualized, predicted ED LOS at a very early stage in the ED visit. This information is especially useful for patients with lower acuity, such as those managed in the LCGMH ED through the fast-track system, because these patients often complain about their waiting times. Further prospective validation is needed to test the predictive power of this model.

Some of the patient-related influential factors on ED LOS were comparable to other published reports. In a large-scale retrospective study in France, patients with lower acuity (categorized using the French clinical classification of emergency patients) were associated with a shorter ED LOS [19]. In two other studies, one using the Australian Triage System and one using the Canadian Triage Acuity System, a longer ED LOS was found in higher acuity patients [20–22]. Besides triage acuity level, advanced age has also been found to be related to a longer LOS among discharged patients [19, 23, 24]. In our study, after controlling for the effect of disease acuity, exams, or whether a consultation was provided, the effect of age group still showed a significant trend in time ratios.

Another group of influential factors includes the diagnostic activities provided in the ED. Some of the covariates, such as consultations, laboratory tests, CT exams, and radiographs

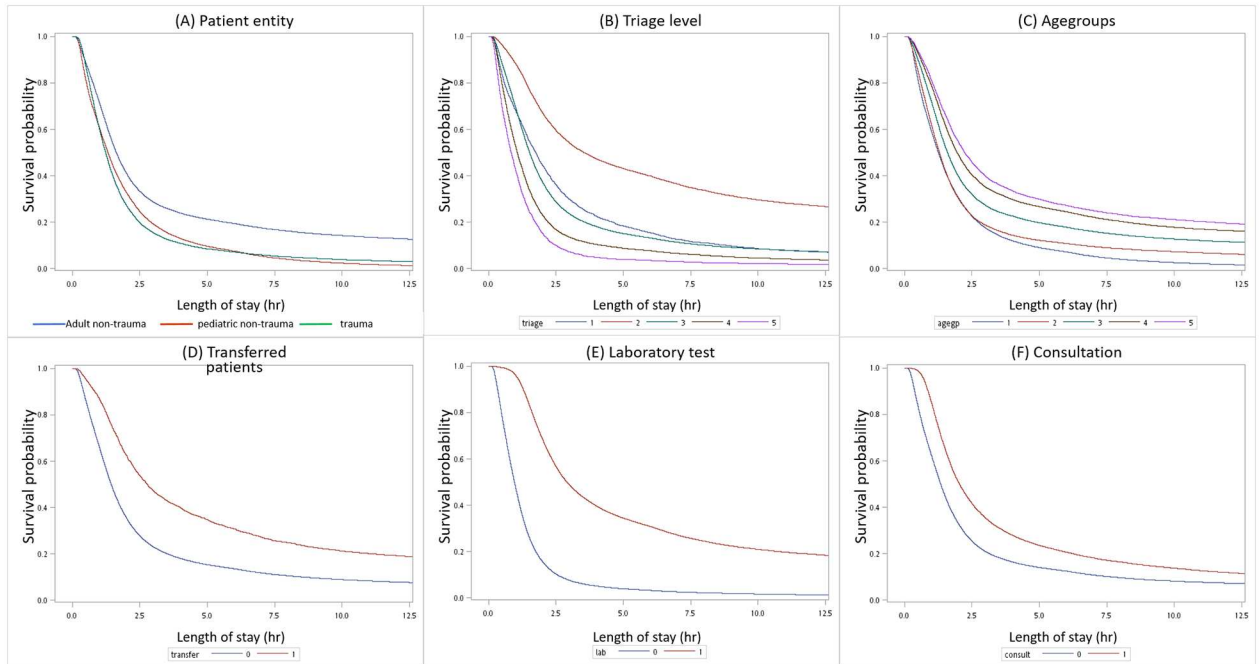

**Fig 2. Divided Kaplan-Meier plots.** The plots were divided by (a) patient entity, (b) triage level (TTAS), (c) agegroup, (d) transferal, (e) laboratory test, and (f) consultation. All showed statistical difference between stratum.

doi:10.1371/journal.pone.0165756.g002

have previously been mentioned [14, 15, 25, 26]. Despite the fact that more exams indicate longer ED LOS, the magnitude of the impact of these exams and services has rarely been quantified and compared. In our study, the most prominent influential factor was providing admission to the hospital or observation, followed by providing laboratory tests. Once the patients were moved to the observation area, the interval between each physician’s re-evaluation dramatically increased from minutes to hours. While some of these patients were waiting for admission and could be re-evaluated the next day, others were just receiving observation or temporary treatment. A protocolled re-assessment time may be needed to shorten the LOS of patients under observation.

Previous studies addressing multivariate event-time analysis tended to use Cox’s proportional hazard regression, but in the current study, the authors used the AFT model for two reasons. First, a Cox regression builds its model upon hazard functions, yielding hazard ratios between groups. In the current study, a hazard ratio may be interpreted as the probability that a patient in the ED with a certain factor would leave the ED in the upcoming time frame compared to that of a patient without this factor. Conversely, an AFT model builds directly upon survival time, yielding a TR. The interpretation of a TR is simply the ratio of LOS between patients with and without the factor. From the authors’ perspective, the latter is more intuitive and applicable in a clinical setting. Second, a Cox regression model addresses the hazard ratio between groups, and the baseline hazard is cancelled out during the estimation. However, to make predictions, baseline hazards need to be obtained accurately. The estimation of the baseline hazard function in the presence of ties may be problematic and requires certain types of estimator approximation [27].

One of the differences in the Taiwanese ED patient management process compared to many other countries is that patients are usually seen by a physician shortly after triage. Because of the unique social environment and easy medical access, our patients do not wait a

**Table 2. Results of multivariate accelerated failure time (AFT) model (n = 106,206).**

| Variables                       | $\beta$ | 95% CI of $\beta$ |        | Time ratio ( $e^\beta$ ) | Pr > ChiSq |
|---------------------------------|---------|-------------------|--------|--------------------------|------------|
| Agegroup                        |         |                   |        |                          |            |
| >80                             | 0.343   | 0.308             | 0.377  | 1.408                    | <.0001     |
| 60–80                           | 0.359   | 0.333             | 0.386  | 1.432                    | <.0001     |
| 40–60                           | 0.291   | 0.266             | 0.316  | 1.337                    | <.0001     |
| 20–40                           | 0.160   | 0.136             | 0.184  | 1.173                    | <.0001     |
| <20                             | 0.000   | .                 | .      | 1.000                    | .          |
| Male Sex                        | -0.018  | -0.029            | -0.007 | 0.982                    | 0.002      |
| Specialty                       |         |                   |        |                          |            |
| Adult non-trauma                | -0.375  | -0.402            | -0.349 | 0.687                    | <.0001     |
| Trauma                          | 0.098   | 0.073             | 0.124  | 1.103                    | <.0001     |
| Pediatric non-trauma            | 0.000   | .                 | .      | 1.000                    | .          |
| Triage Level                    |         |                   |        |                          |            |
| Level 1                         | 0.295   | 0.246             | 0.344  | 1.343                    | <.0001     |
| Level 2                         | 0.388   | 0.345             | 0.431  | 1.474                    | <.0001     |
| Level 3                         | 0.161   | 0.123             | 0.199  | 1.175                    | <.0001     |
| Level 4                         | 0.046   | 0.007             | 0.086  | 1.047                    | 0.022      |
| Level 5                         | 0.000   | .                 | .      | 1.000                    | .          |
| Transferred patients            | 0.300   | 0.267             | 0.333  | 1.350                    | <.0001     |
| ECG obtained                    | -0.163  | -0.183            | -0.143 | 0.850                    | <.0001     |
| X-ray obtained                  | 0.166   | 0.154             | 0.178  | 1.181                    | <.0001     |
| CT obtained                     | 0.415   | 0.392             | 0.439  | 1.515                    | <.0001     |
| Laboratory test provided        | 0.976   | 0.963             | 0.989  | 2.654                    | <.0001     |
| Consultation provided           | 0.489   | 0.475             | 0.504  | 1.631                    | <.0001     |
| Admission/Observation provided  | 2.132   | 2.113             | 2.152  | 8.435                    | <.0001     |
| Critical condition              | 0.186   | 0.093             | 0.280  | 1.205                    | <.0001     |
| Weekend arrival                 | -0.074  | -0.086            | -0.062 | 0.928                    | <.0001     |
| ED daily census > 95 percentile | 0.056   | 0.029             | 0.083  | 1.057                    | <.0001     |
| Arriving time                   |         |                   |        |                          |            |
| Day shift                       | 0.201   | 0.186             | 0.216  | 1.223                    |            |
| Evening shift                   | 0.143   | 0.129             | 0.158  | 1.154                    | <.0001     |
| Night shift                     | 0.000   | .                 | .      | 1.000                    | .          |

doi:10.1371/journal.pone.0165756.t002

long time before being seen by an emergency physician, as indicated by a median time of 11 minutes between triage and physician and the rate of those leaving without being seen remaining low at 0.02%. However, a very small waiting room results in more crowded queues in the treatment and observation areas. The influence of different practice behaviors on ED LOS or ED crowding may need further research to clarify.

### Limitations

There are several limitations in this study. First, it is a single-center study, and so the findings of the current research may not be generalizable or applicable in different patient populations. Second, there are still some possible correlates that are not included in the model due to the limitation of our dataset. Third, some of the discharged patients were initially arranged for admission. They were treated in the ED for one or several days while waiting for a floor bed and were then discharged by the ED physician due to their improved condition. The



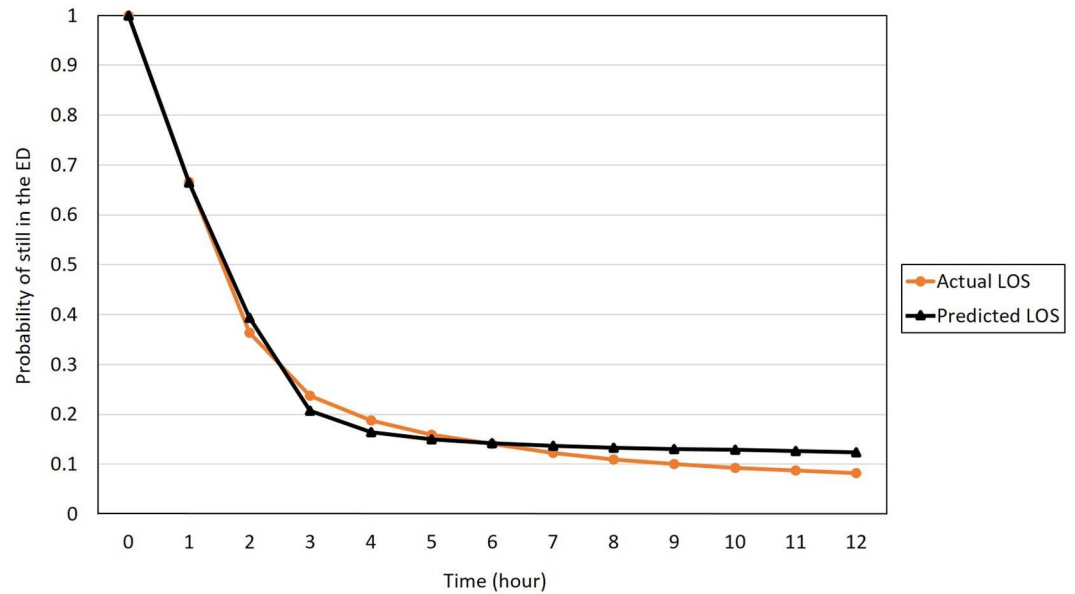

**Fig 3. Survival curve of model predicted LOS against actual LOS.**

doi:10.1371/journal.pone.0165756.g003

pattern and influential factors of the ED LOS for this group may need further analysis in a future study.

### Conclusion

This study demonstrated the influential factors of ED LOS in patients discharged from the ED. Age was associated with a progressive increase in LOS, and patients with higher acuity stayed in the ED longer. Diagnostic activities provided in the ED also had various effects on the ED LOS; among these, providing observation or laboratory tests had the largest impact. Patients who arrived during the day or on a very busy day also had a longer ED LOS. The model’s predicted ED LOS may provide useful information for physicians or patients to better anticipate an individual’s LOS and assist the administrative level in planning its staffing policy in order to improve the patient care process.

### Author Contributions

**Conceptualization:** CHC HHC TFC.

**Data curation:** HHC SHC.

**Formal analysis:** CHC HHC.

**Investigation:** CHC.

**Methodology:** HHC SHC.

**Project administration:** CHC TFC.

**Resources:** TFC.

**Software:** AMFY.

**Supervision:** HHC AMFY SLP TFC.

**Validation:** HHC.

**Visualization:** CHC.

**Writing – original draft:** CHC.

**Writing – review & editing:** PT.

## References

1. Carr BG, Kaye AJ, Wiebe DJ, Gracias VH, Schwab CW, Reilly PM. Emergency department length of stay: a major risk factor for pneumonia in intubated blunt trauma patients. *The Journal of trauma*. 2007; 63(1):9–12. doi: [10.1097/TA.0b013e31805d8f6b](https://doi.org/10.1097/TA.0b013e31805d8f6b) PMID: [17622862](https://pubmed.ncbi.nlm.nih.gov/17622862/)
2. Mowery NT, Dougherty SD, Hildreth AN, Holmes JH, Chang MC, Martin RS, et al. Emergency department length of stay is an independent predictor of hospital mortality in trauma activation patients. *The Journal of trauma*. 2011; 70(6):1317–25. doi: [10.1097/TA.0b013e3182175199](https://doi.org/10.1097/TA.0b013e3182175199) PMID: [21817968](https://pubmed.ncbi.nlm.nih.gov/21817968/)
3. Liew D, Liew D, Kennedy MP. Emergency department length of stay independently predicts excess inpatient length of stay. *The Medical journal of Australia*. 2003; 179(10):524–6. PMID: [14609414](https://pubmed.ncbi.nlm.nih.gov/14609414/)
4. Bernstein SL, Asplin BR. Emergency department crowding: old problem, new solutions. *Emergency medicine clinics of North America*. 2006; 24(4):821–37. doi: [10.1016/j.emc.2006.06.013](https://doi.org/10.1016/j.emc.2006.06.013) PMID: [16982341](https://pubmed.ncbi.nlm.nih.gov/16982341/)
5. Casalino E, Choquet C, Bernard J, Debit A, Doumenc B, Berthoumieu A, et al. Predictive variables of an emergency department quality and performance indicator: a 1-year prospective, observational, cohort study evaluating hospital and emergency census variables and emergency department time interval measurements. *Emergency medicine journal: EMJ*. 2013; 30(8):638–45. doi: [10.1136/emmermed-2012-201404](https://doi.org/10.1136/emmermed-2012-201404) PMID: [22906702](https://pubmed.ncbi.nlm.nih.gov/22906702/)
6. Tang N, Stein J, Hsia RY, Maselli JH, Gonzales R. Trends and characteristics of US emergency department visits, 1997–2007. *Jama*. 2010; 304(6):664–70. doi: [10.1001/jama.2010.1112](https://doi.org/10.1001/jama.2010.1112) PMID: [20699458](https://pubmed.ncbi.nlm.nih.gov/20699458/)
7. Association. AH. Trendwatch chartbook 2014 [Internet]. Chicago (IL): AHA; 2014. Table 3.3, Emergency department visits, emergency department visits per 1,000, and number of emergency departments, 1992–2012; [cited 2015 Nov 25]. <http://www.aha.org/research/reports/tw/chartbook/2014/table3-3.pdf>.
8. Morganti KG, Bauhoff S, Blanchard JC, Abir M, Iyer N. The evolving role of emergency departments in the United States. Rand Corporation. 2013.
9. Gorunescu F, McClean SI, Millard PH. Using a queueing model to help plan bed allocation in a department of geriatric medicine. *Health care management science*. 2002; 5(4):307–12. PMID: [12437280](https://pubmed.ncbi.nlm.nih.gov/12437280/)
10. Cournane S, Byrne D, O’Riordan D, Silke B. Factors associated with length of stay following an emergency medical admission. *Eur J Intern Med*. 2015; 26(4):237–42. doi: [10.1016/j.ejim.2015.02.017](https://doi.org/10.1016/j.ejim.2015.02.017) PMID: [25743060](https://pubmed.ncbi.nlm.nih.gov/25743060/)
11. Rotstein Z, Barabash G, Noy S, Wilf-Miron R, Shani M. Allocation of emergency ward patients to medicine departments: increasing physicians’ incentive to shorten length of stay. *Public Health Rev*. 1996; 24(1):37–48. PMID: [8803471](https://pubmed.ncbi.nlm.nih.gov/8803471/)
12. Pines JM, Prabhu A, Hilton JA, Hollander JE, Datner EM. The effect of emergency department crowding on length of stay and medication treatment times in discharged patients with acute asthma. *Academic emergency medicine: official journal of the Society for Academic Emergency Medicine*. 2010; 17(8):834–9.
13. McCarthy ML, Zeger SL, Ding R, Levin SR, Desmond JS, Lee J, et al. Crowding delays treatment and lengthens emergency department length of stay, even among high-acuity patients. *Ann Emerg Med*. 2009; 54(4):492–503 e4. doi: [10.1016/j.annemergmed.2009.03.006](https://doi.org/10.1016/j.annemergmed.2009.03.006) PMID: [19423188](https://pubmed.ncbi.nlm.nih.gov/19423188/)
14. Brick C, Lowes J, Lovstrom L, Kokotilo A, Villa-Roel C, Lee P, et al. The impact of consultation on length of stay in tertiary care emergency departments. *Emergency medicine journal: EMJ*. 2014; 31(2):134–8. doi: [10.1136/emmermed-2012-201908](https://doi.org/10.1136/emmermed-2012-201908) PMID: [23353666](https://pubmed.ncbi.nlm.nih.gov/23353666/)
15. Kocher KE, Meurer WJ, Desmond JS, Nallamothu BK. Effect of testing and treatment on emergency department length of stay using a national database. *Academic emergency medicine: official journal of the Society for Academic Emergency Medicine*. 2012; 19(5):525–34.
16. Marubini E, Valsecchi MG. *Analysing survival data from clinical trials and observational studies*: John Wiley & Sons; 2004.
17. Bradburn MJ, Clark TG, Love SB, Altman DG. Survival analysis part II: multivariate data analysis—an introduction to concepts and methods. *British journal of cancer*. 2003; 89(3):431–6. doi: [10.1038/sj.bjc.6601119](https://doi.org/10.1038/sj.bjc.6601119) PMID: [12888808](https://pubmed.ncbi.nlm.nih.gov/12888808/)

18. SAS Institute Inc., SAS 9.3 Documentation 2015. <http://support.sas.com>.
19. Capuano F, Lot AS, Sagnes-Raffy C, Ferrua M, Brun-Ney D, Leleu H, et al. Factors associated with the length of stay of patients discharged from emergency department in France. *Eur J Emerg Med*. 2015; 22(2):92–8. doi: [10.1097/MEJ.000000000000109](https://doi.org/10.1097/MEJ.000000000000109) PMID: [24569799](https://pubmed.ncbi.nlm.nih.gov/24569799/)
20. Mahmoud I, Hou XY, Chu K, Clark M. Language affects length of stay in emergency departments in Queensland public hospitals. *World J Emerg Med*. 2013; 4(1):5–9. PMID: [25215085](https://pubmed.ncbi.nlm.nih.gov/25215085/)
21. Goldman RD, Amin P, Macpherson A. Language and length of stay in the pediatric emergency department. *Pediatric emergency care*. 2006; 22(9):640–3. doi: [10.1097/01.pec.0000227865.38815.ec](https://doi.org/10.1097/01.pec.0000227865.38815.ec) PMID: [16983248](https://pubmed.ncbi.nlm.nih.gov/16983248/)
22. Casalino E, Wargon M, Peroziello A, Choquet C, Leroy C, Beaune S, et al. Predictive factors for longer length of stay in an emergency department: a prospective multicentre study evaluating the impact of age, patient's clinical acuity and complexity, and care pathways. *Emergency medicine journal: EMJ*. 2014; 31(5):361–8. doi: [10.1136/emered-2012-202155](https://doi.org/10.1136/emered-2012-202155) PMID: [23449890](https://pubmed.ncbi.nlm.nih.gov/23449890/)
23. Singler K, Bail HJ, Christ M, Weis P, Sieber C, Heppner HJ, et al. [Correlation of patients age on length of stay and admission rate in a German emergency department]. *Dtsch Med Wochenschr*. 2013; 138(30):1503–8. doi: [10.1055/s-0033-1343315](https://doi.org/10.1055/s-0033-1343315) PMID: [23860679](https://pubmed.ncbi.nlm.nih.gov/23860679/)
24. Chaou CH, Chiu TF, Yen AM, Ng CJ, Chen HH. Analyzing Factors Affecting Emergency Department Length of Stay-Using a Competing Risk-accelerated Failure Time Model. *Medicine (Baltimore)*. 2016; 95(14):e3263.
25. Li ST, Chiu NC, Kung WC, Chen JC. Factors affecting length of stay in the pediatric emergency department. *Pediatr Neonatol*. 2013; 54(3):179–87. doi: [10.1016/j.pedneo.2012.11.014](https://doi.org/10.1016/j.pedneo.2012.11.014) PMID: [23597551](https://pubmed.ncbi.nlm.nih.gov/23597551/)
26. Yoon P, Steiner I, Reinhardt G. Analysis of factors influencing length of stay in the emergency department. *CJEM*. 2003; 5(3):155–61. PMID: [17472779](https://pubmed.ncbi.nlm.nih.gov/17472779/)
27. Collett D. *Modelling survival data in medical research*. 3rd ed: CRC press; 2015.
